# Supplementary material for: The functionalization of poly(ε-caprolactone) as a versatile platform using ε-(α-phenylseleno) caprolactone as a monomer
Source: Royal Society of Chemistry journal article supplement (doi:10.1039/c9py00467j), 2019-01-01
Supplement: c9py00467j1.pdf [file c9py00467j1.pdf]

## Functionalization of Poly( $\epsilon$ -caprolactone) as a Versatile Platform

### Using $\epsilon$ -( $\alpha$ -Phenylseleno) Caprolactone as Monomer

Jin'an Wu,<sup>†a</sup> Chunlai Ding,<sup>†a</sup> Dong Xin,<sup>a</sup> Zhengbiao Zhang,<sup>a</sup> Xiaofei Huang,<sup>c</sup> Xiulin Zhu,<sup>a,b</sup> Xiangqiang Pan<sup>\*a</sup> and Jian Zhu<sup>\*a</sup>

a. State and Local Joint Engineering Laboratory for Novel Functional Polymeric Materials, Jiangsu Key Laboratory of Advanced Functional Polymer Design and Application, Department of Polymer Science and Engineering, College of Chemistry, Chemical Engineering and Materials Science, Soochow University, Suzhou 215123, China

b. Global Institute of Software Technology, No 5. Qingshan Road, Suzhou National Hi-Tech District, Suzhou 215163, China.

c. Jiangsu Litian Technology Co. Ltd., Rudong County, Jiangsu 226407, China

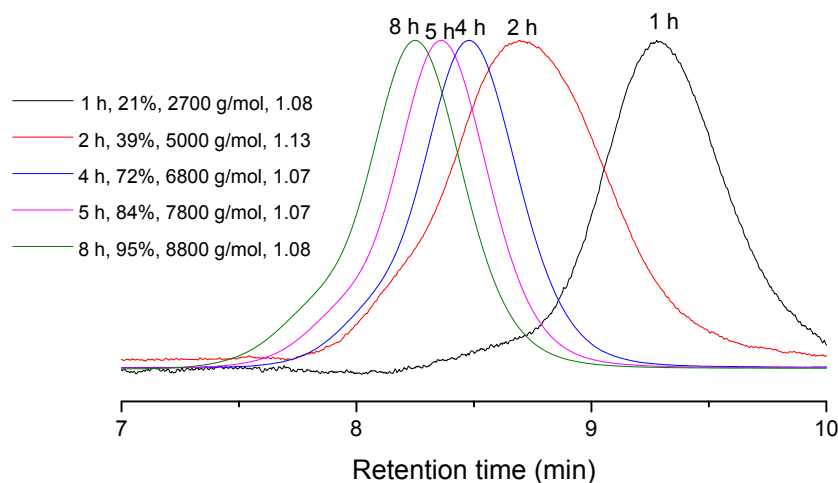

**Fig S1** SEC traces of polymers obtained by ring-opening polymerization with  $[\text{CLSePh}]_0:[\text{EG}]_0 = 50:1$  at  $100^\circ\text{C}$

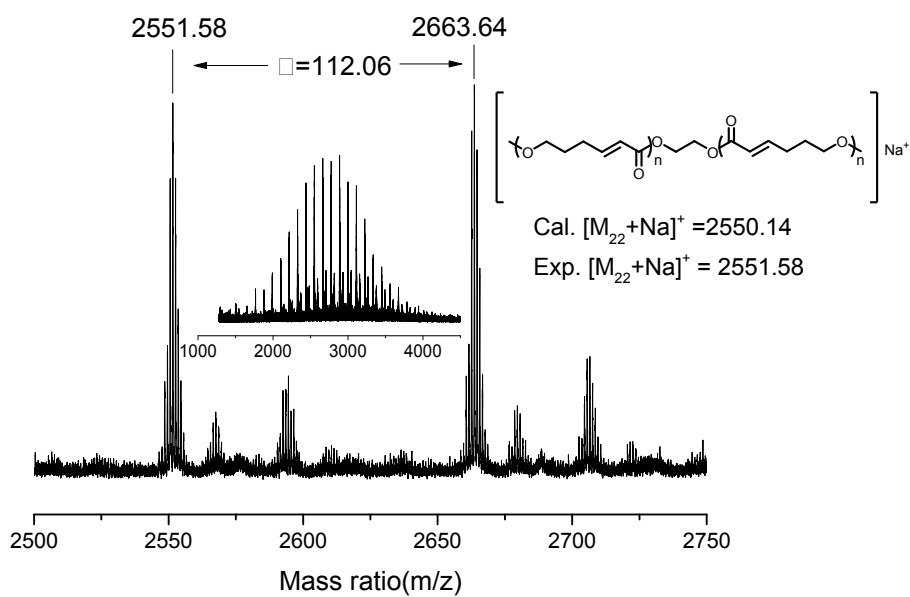

**Fig. S2** MALDI-ToF mass spectrum of PCLSePh ( $M_{n,SEC} = 5500 \text{ g mol}^{-1}$ ,  $\mathcal{D} = 1.11$ ) after oxidation.

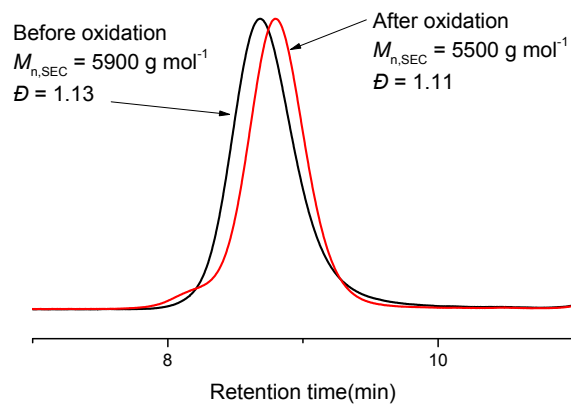

**Fig S3** The SEC traces of polymers before and after oxidization.

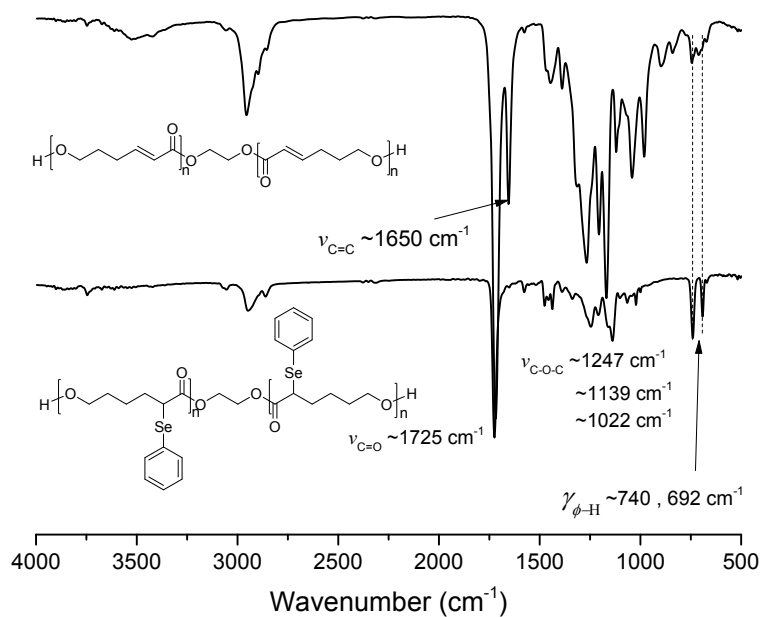

**Fig. S4** FTIR spectra of polymer before and after oxidation.

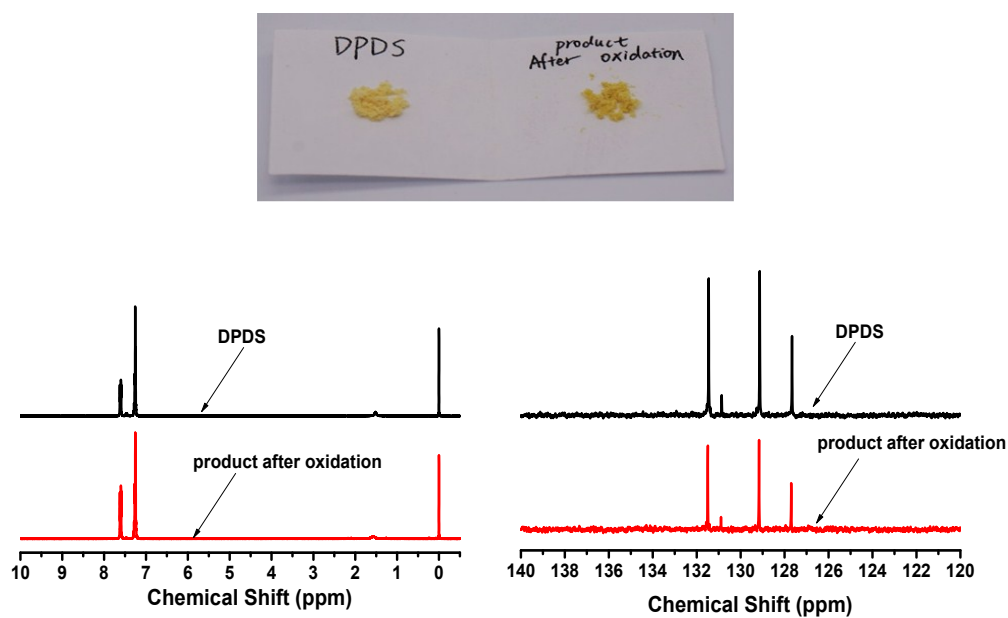

**Fig. S5**  $^1\text{H}$  NMR and  $^{13}\text{C}$  NMR spectra of original and the recycled DPDS after oxidation treatment.

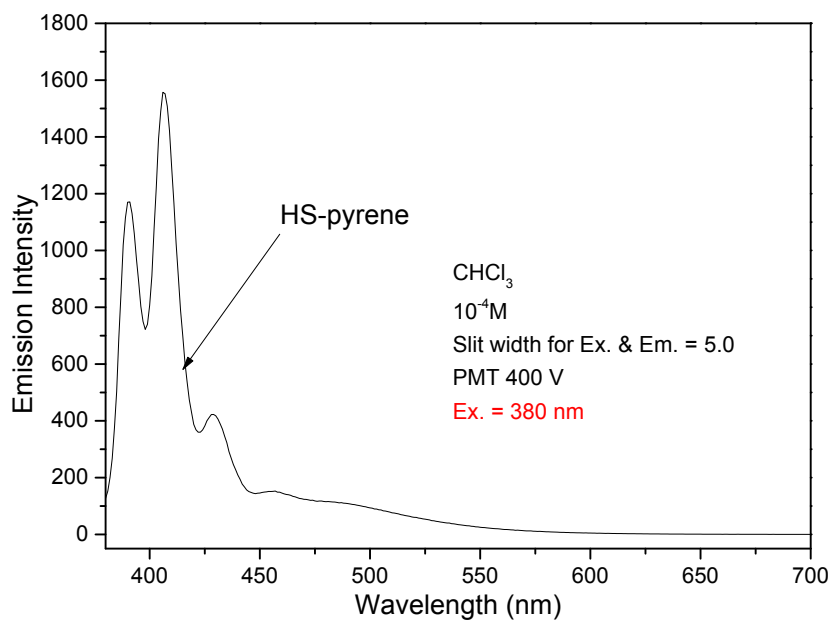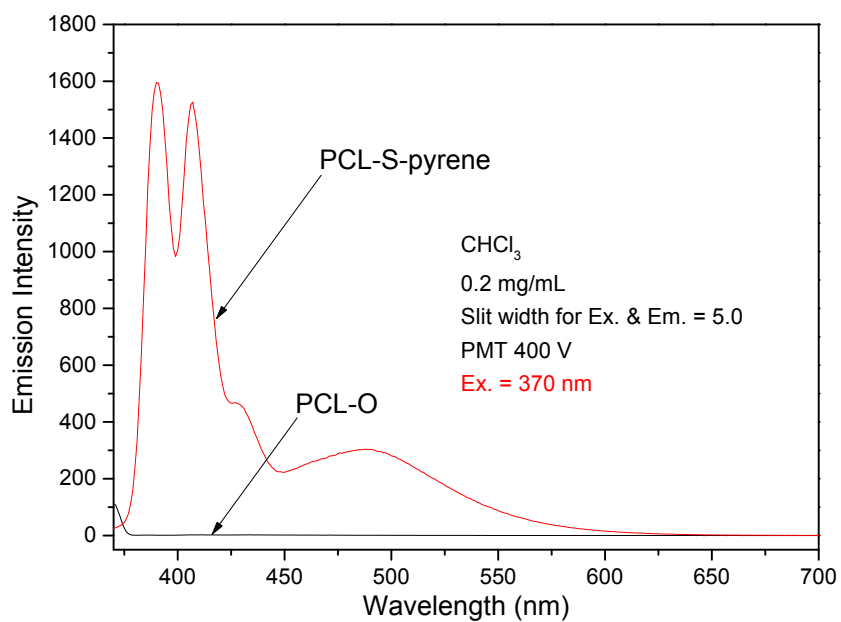

**Fig. S6** fluorescence analysis of pyrenemercaptan, PCL-O (polymer after oxidation) and PCL-S-pyrene.

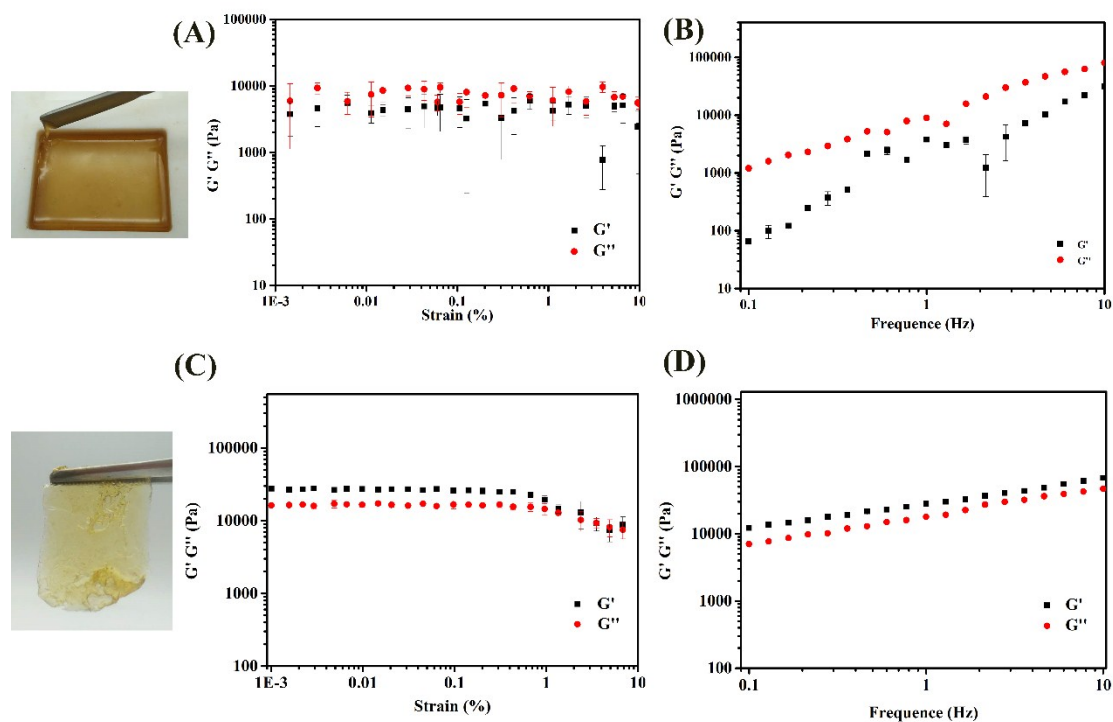

**Fig. S7** Influence of strain and frequency on elastic modulus  $G'$  and loss modulus  $G''$  of polymer before (A, B) and after (C, D) heating.

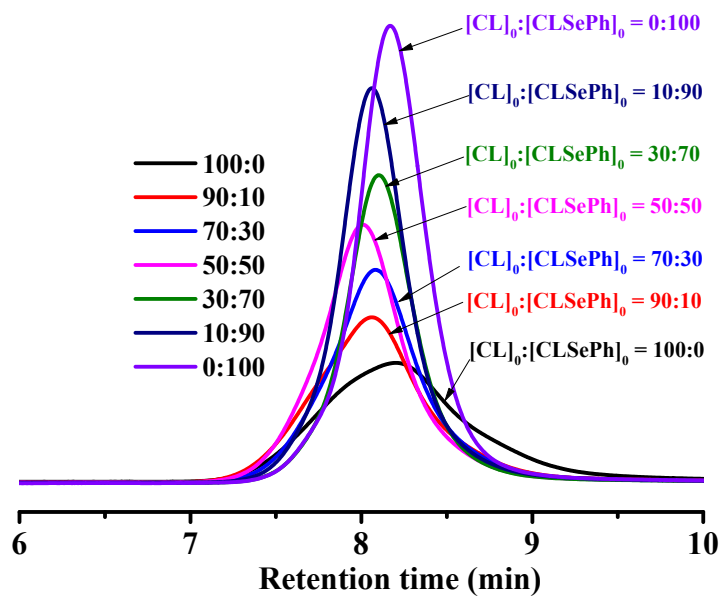

**Fig. S8** SEC traces of copolymers prepared by random ring opening copolymerization.

**Table S1**  $T_g$  values of copolymers before and after oxidation.

| Entry | $f^a$ | $F^b$ | $T_g$ (before oxidation)<br>/°C | $T_g$ (after oxidation)<br>/°C |
|-------|-------|-------|---------------------------------|--------------------------------|
| 1     | 1.0   | 1.0   | -8.96                           | -27.82                         |
| 2     | 0.9   | 0.85  | -14.16                          | -35.21                         |
| 3     | 0.7   | 0.63  | -22.08                          | -48.64                         |
| 4     | 0.5   | 0.44  | -33.83                          | -53.45                         |
| 5     | 0.3   | 0.26  | -46.04                          | -53.72                         |
| 6     | 0.1   | 0.08  | -51.01                          | -                              |
| 7     | 0.9   | 0.0   | -60.00                          | -60.00                         |

<sup>a</sup>molar fraction of CLSePh in the comonomer feed. <sup>b</sup>molar fraction of CLSePh in the random copolymer.

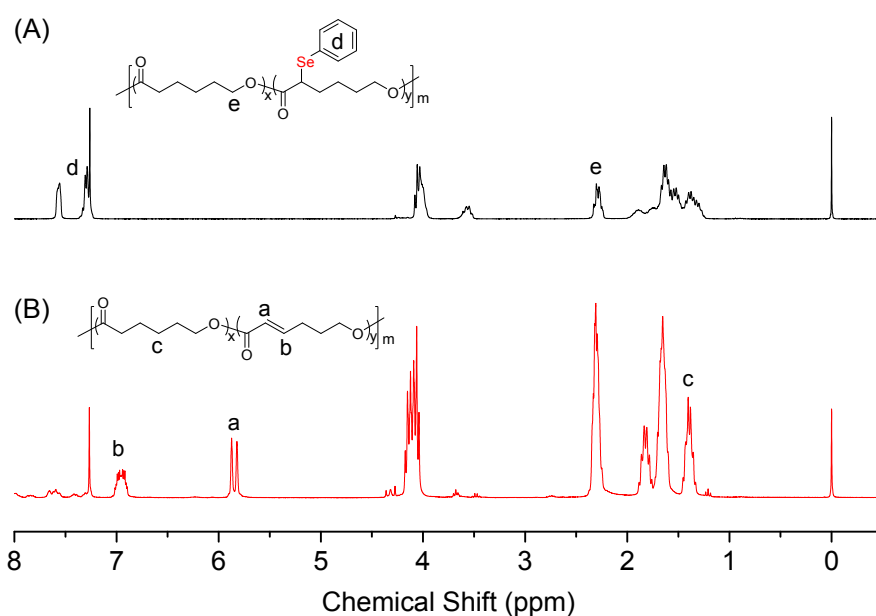

**Fig. S9**  $^1\text{H}$  NMR of copolymers before and after oxidation. (A) Before oxidation (Table S1, Entry 4, prepared by ring-opening polymerization with  $\text{Sn}(\text{Oct})_2$  as catalyst at  $100^\circ\text{C}$  in glove box); (B) After oxidation elimination reaction (Table S2, Entry 4).

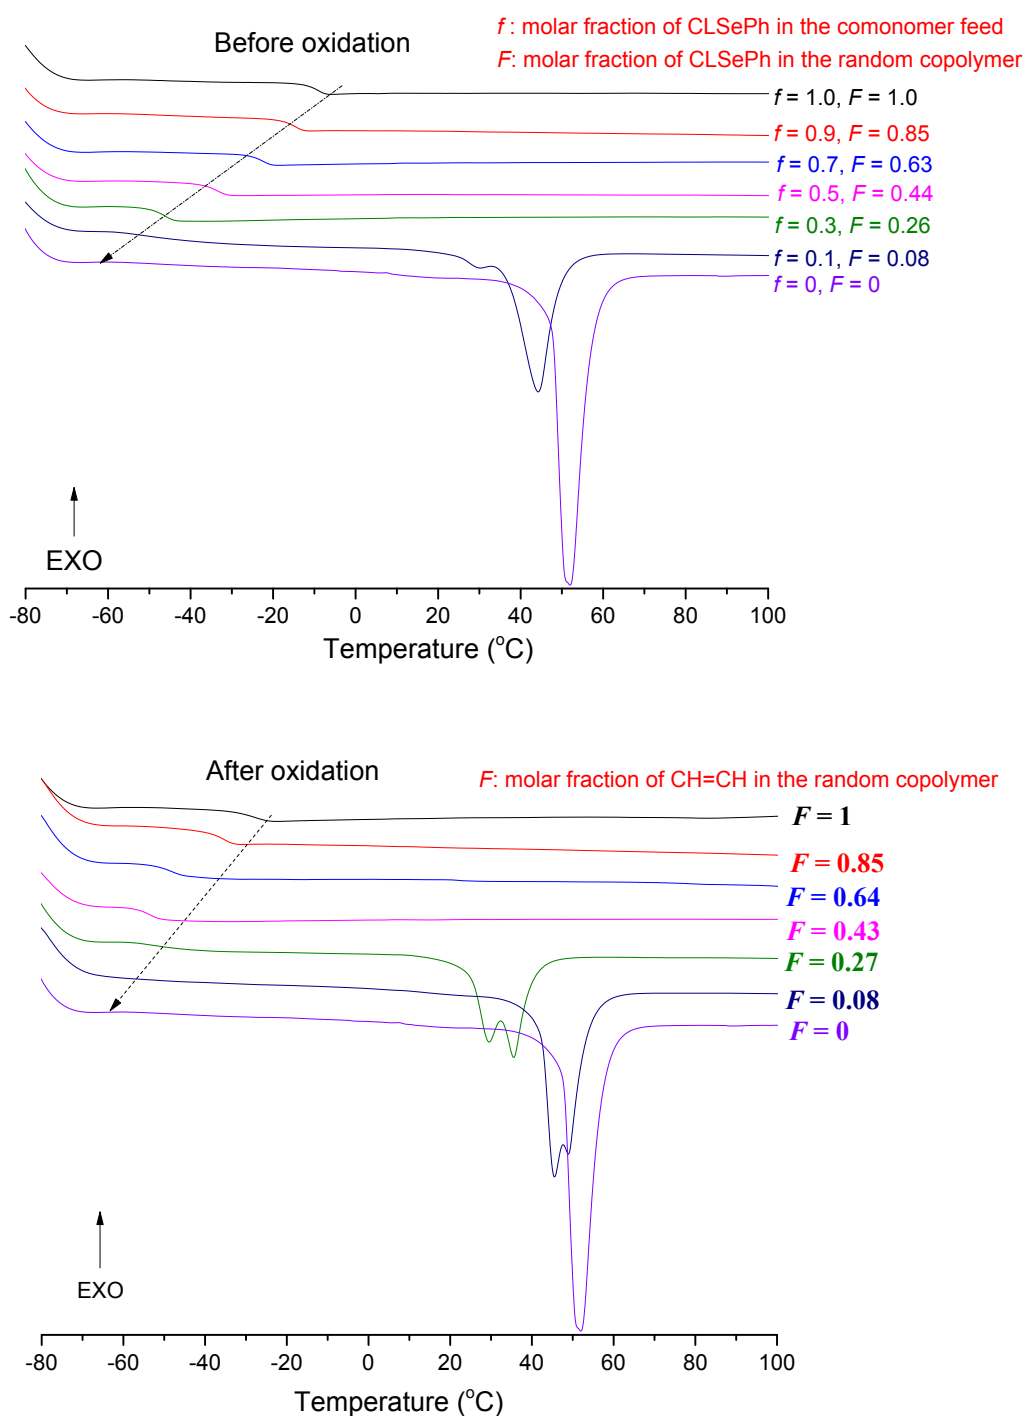

**Fig. S10** DSC curves during the second heating process of random copolymers before and after oxidation at the heating rates of 20 °C min<sup>-1</sup>.

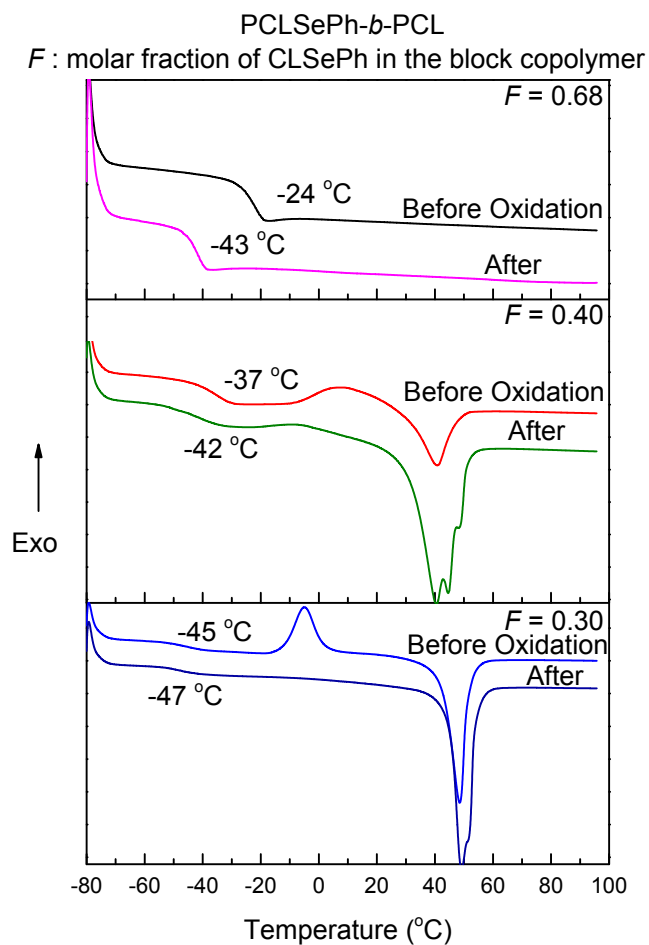

**Fig. S11** DSC curves during the second heating process of block copolymers before and after oxidation at the heating rates of  $20\text{ °C min}^{-1}$ .

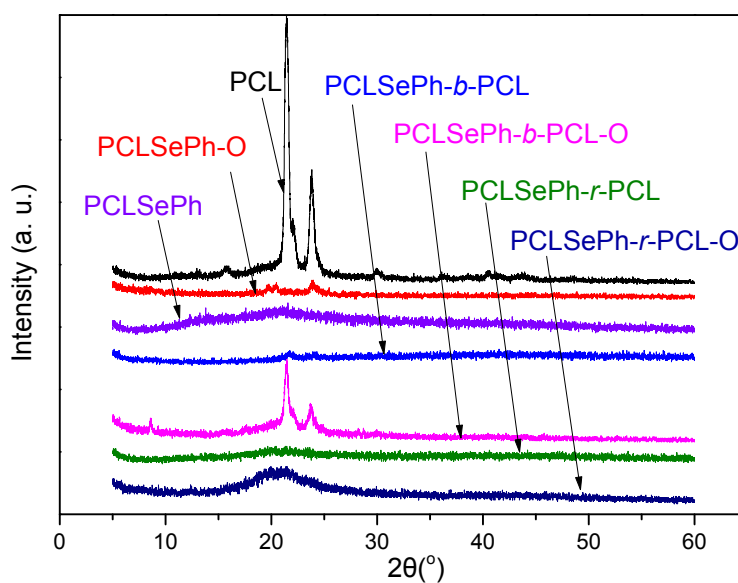



**Fig. S12** X-Ray Diffraction (XRD) patterns of polymers including PCL, PCLSePh and its oxidation product (PCLSePh-O), random copolymer (PCLSePh-*r*-PCL) and its oxidation product (PCLSePh-*r*-PCL-O), block copolymer (PCLSePh-*b*-PCL) and its oxidation product (PCLSePh-*b*-PCL-O).

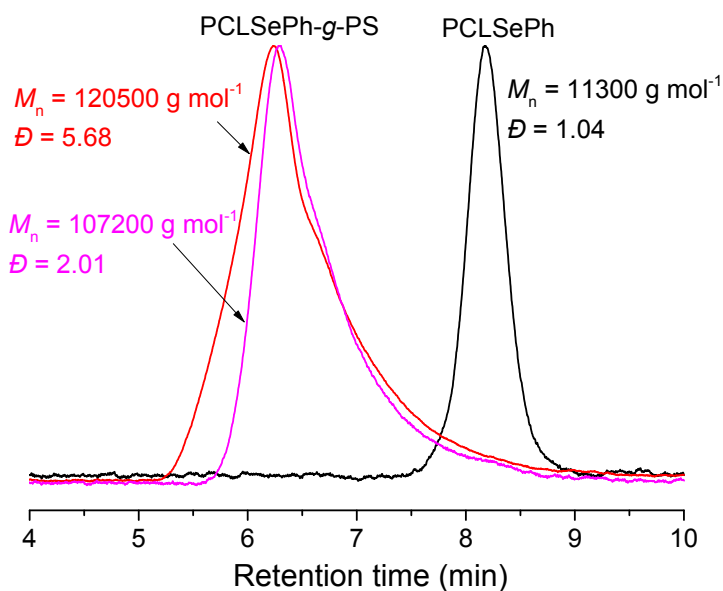

**Fig. S13** SEC traces of hybrid polymers prepared from radical polymerization of styrene using PCLSePh as macroinitiator under UV irradiation for 1 hour (pink line) and 2 hours (red line), respectively.

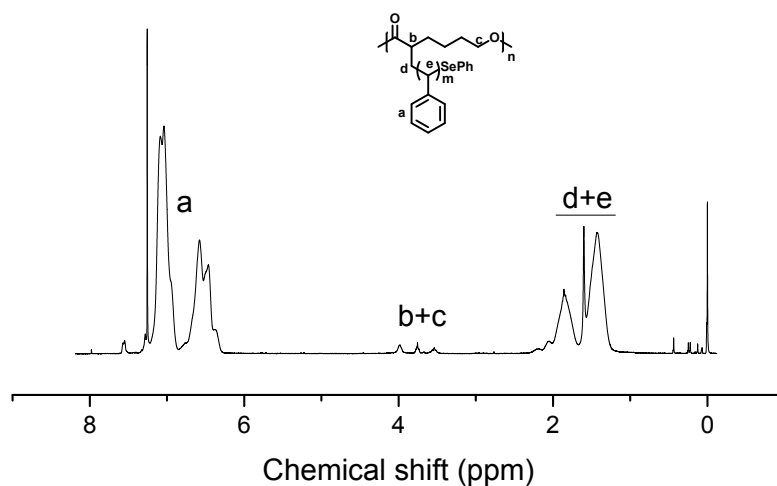

**Fig. S14**  $^1\text{H}$  NMR of hybrid polymer prepared from radical polymerization of styrene using PCLSePh as macroinitiator under UV irradiation for 1 hour.

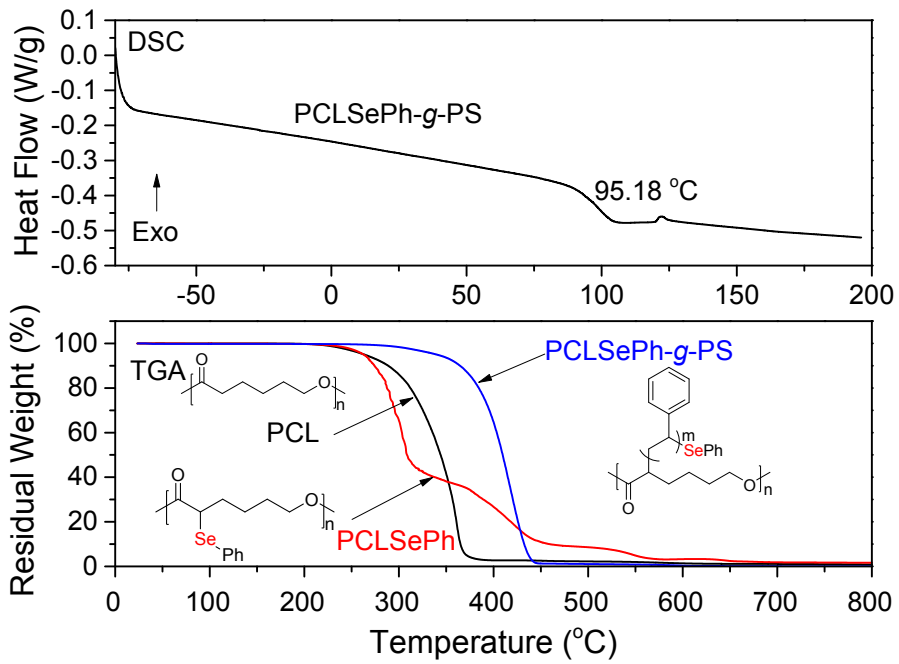

**Fig. S15** Thermogravimetric analysis of different functionalized PCLs.
